# Supplementary material
Source: publisher figshare collection journal article supplement (https://acs.figshare.com/ndownloader/files/4544653)

**Supporting information**  
for  
**Effect of Chlorination on the Estrogenic/Anti-Estrogenic Activities of**  
**Biologically Treated Wastewater**

Qian-Yuan Wu, Hong-Ying Hu,\* Xin Zhao and Ying-Xue Sun

Environmental Simulation and Pollution Control State Key Joint Laboratory,  
Department of Environmental Science and Engineering, Tsinghua University, Beijing  
100084, PR China

**List of supporting information:**

Table S1 EEM peaks for sample C and its fractions

(Page 13 of the paper)

Figure S1 Dose-response curves of anti-estrogenic activity in sample C before  
and after chlorination (10 mg-Cl<sub>2</sub>/L).

(Page 10 of the paper)

Figure S2 Dose-response curves of anti-estrogenic activity in tryptophan (20  
mg/L) solution before and after chlorination (30 mg-Cl<sub>2</sub>/L).

(Page 14 of the paper)

TABLE S1. EEM peaks for sample C and its fractions

| Peak | SC               |            | PC               |            | MPC              |            | NPC              |            | Substance                            |
|------|------------------|------------|------------------|------------|------------------|------------|------------------|------------|--------------------------------------|
|      | Ex/Em<br>(nm/nm) | FI<br>(AU) | Ex/Em<br>(nm/nm) | FI<br>(AU) | Ex/Em<br>(nm/nm) | FI<br>(AU) | Ex/Em<br>(nm/nm) | FI<br>(AU) |                                      |
| Flu1 | 225/300          | 3392       | 225/300          | 2283       | 220/289          | 928        | 220/295          | 949        | tyrosine-like,<br>aromatic protein   |
| Flu2 | 230/345          | 4664       | 230/345          | 4423       | 225/358          | 526        | ND               | ND         | tryptophan-like,<br>aromatic protein |
| Flu3 | 275/305          | 2419       | 275/305          | 2120       | 275/305          | 1197       | 275/305          | 1185       | soluble microbial<br>byproduct-like  |
| Flu4 | 280/343          | 2367       | 280/345          | 2255       | ND               | ND         | ND               | ND         | soluble microbial<br>byproduct-like  |
| Flu5 | 240/411          | 1811       | 250/419          | 1732       | ND               | ND         | ND               | ND         | humic/fulvic<br>acid-like            |

SC, sample C; PC, polar compounds; MPC, mid-polar compounds; NPC, non-polar compounds.

FI, the fluorescence spectroscopy intensity of the sample and its fractions at  $\text{Ex}_{\text{max}}/\text{Em}_{\text{max}}$ . ND, not detected.

FIGURE S1. Dose-response curves of anti-estrogenic activity in sample C before and after chlorination (10 mg-Cl<sub>2</sub>/L). Error bars represent the standard deviation based on triplicate analyses.

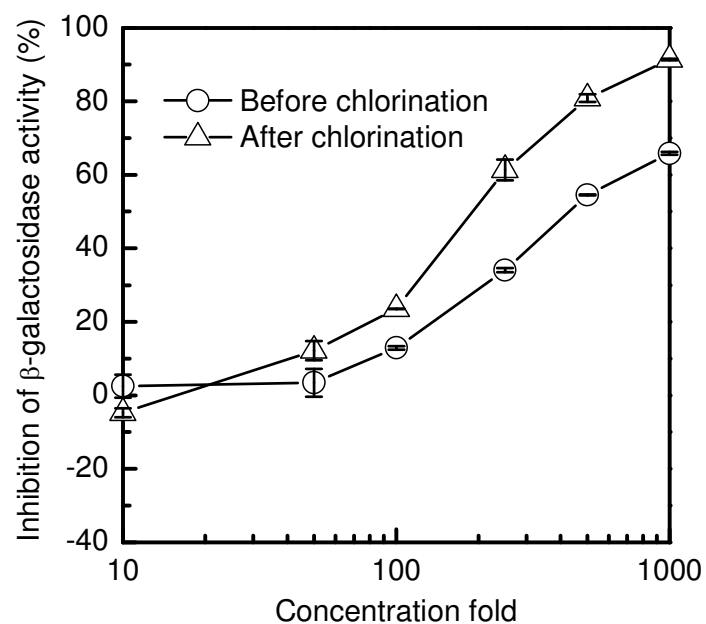

FIGURE S2. Dose-response curves of anti-estrogenic activity in tryptophan (20 mg/L) solution before and after chlorination (30 mg-Cl<sub>2</sub>/L). Error bars represent the standard deviation based on triplicate analyses.

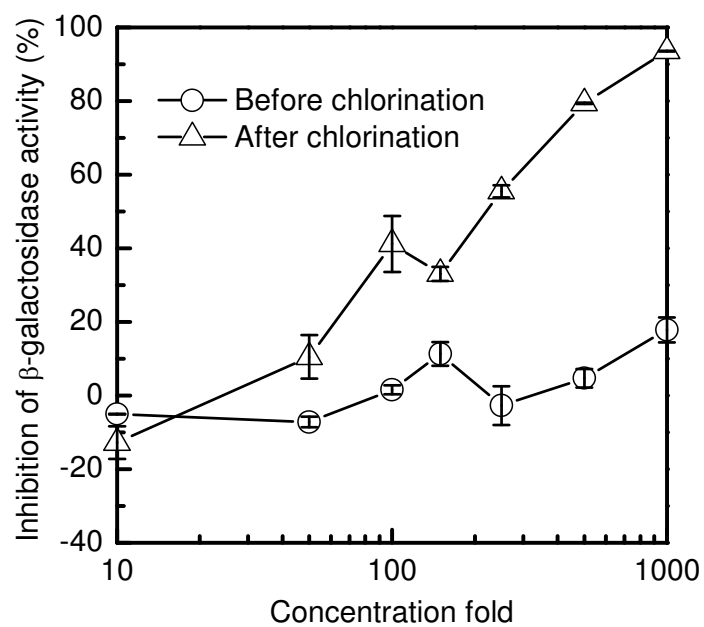

Supplement: Supplementary file 1 [file 4544653]
